# Supplementary material for: ZnO films using a precursor solution irradiated with an electron beam as the cathode interfacial layer in inverted polymer solar cells
Source: Royal Society of Chemistry journal article supplement (doi:10.1039/c7ra02415k), 2017-01-01
Supplement: c7ra02415k1.pdf [file c7ra02415k1.pdf]

## Supporting Information

# ZnO films using the irradiated precursor solution with electron beam as a cathode interfacial layer in inverted polymer solar cells

*Rira Kang<sup>a</sup>, Yong-Jin Noh<sup>b</sup>, Jin-Mun Yun<sup>a</sup>, Hyun bin Kim<sup>a</sup>, NoSung Myoung<sup>d</sup>, Eun-Hye Lee<sup>c</sup>,  
Tae-Wook Kim<sup>c</sup>, Seok-In Na<sup>b,\*</sup>, Seung-Hwan Oh<sup>a,\*</sup>*

### AUTHOR ADDRESS

<sup>a</sup> Radiation Research Division for Industry and Environment, Korea Atomic Energy Research Institute (KAERI), 29 Geungu-gil, Jeongseup-si, Jeollabuk-do 580-185, Republic of Korea

<sup>b</sup> Professional Graduate School of Flexible and Printable Electronics and Polymer Materials Fusion Research Center, Chonbuk National University, 664-14, Deokjin-dong, Jeonju-si, Jeollabuk-do 561-756, Republic of Korea

<sup>c</sup> Soft Innovative Materials Research Center, Institute of Advanced Composite Materials, Korea Institute of Science and Technology, Jeollabuk-do 565-905, Republic of Korea

<sup>d</sup> Advanced Photonics Research Institute (APRI), Gwangju Institute of Science and Technology (GIST), Gwangju 61005, Republic of Korea

## Supporting Information

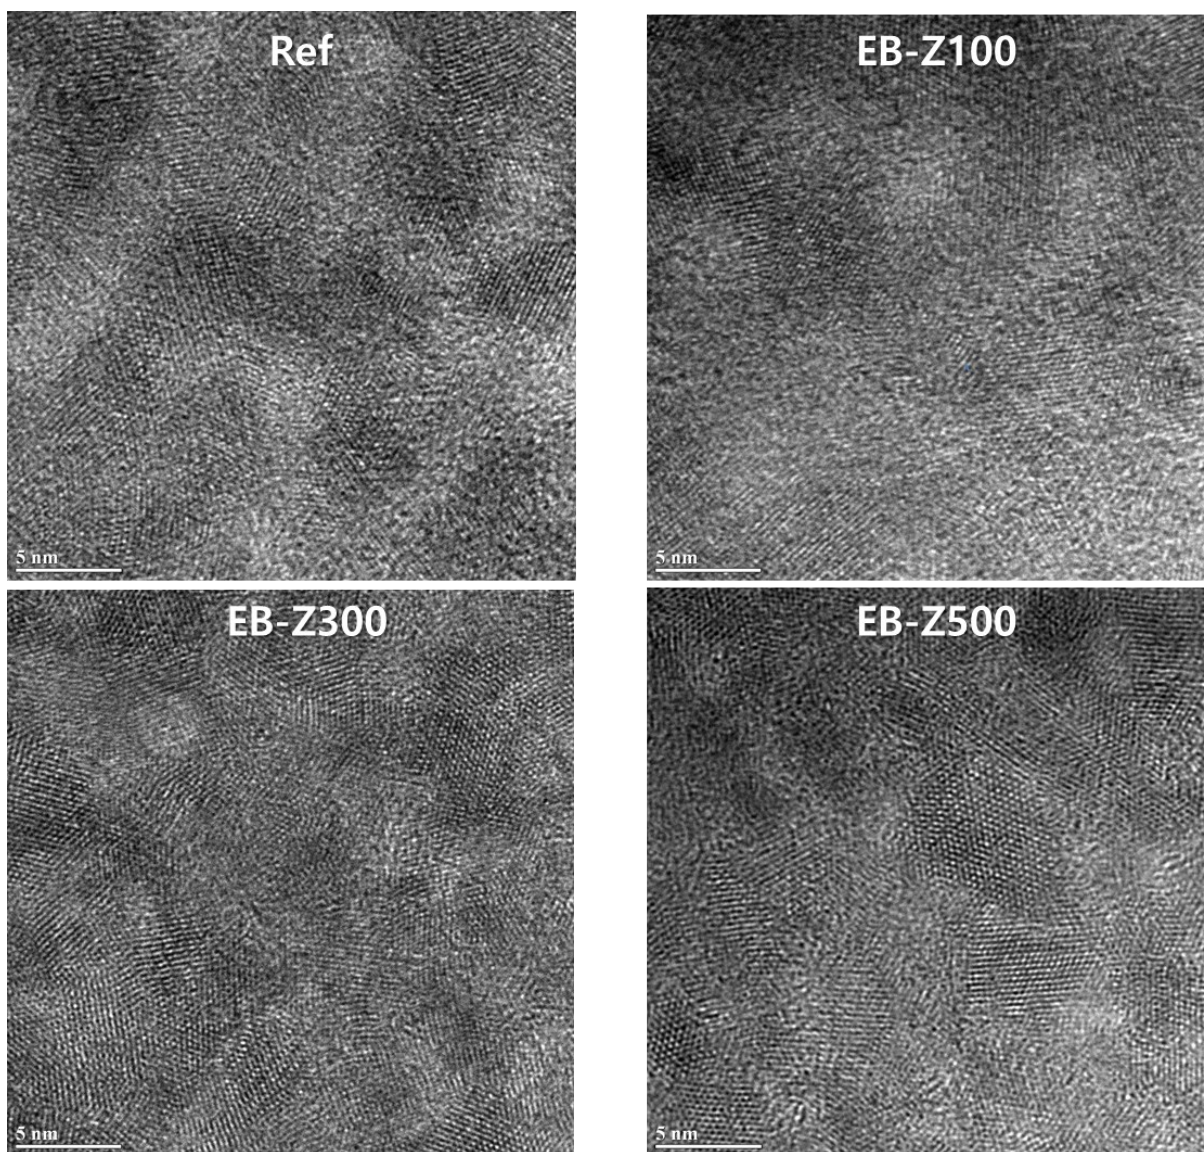

Figure S1. TEM images of **Ref**, **EB-Z100**, **EB-Z300** and **EB-Z500**.
